# Supplementary material
Source: PubMed Central journal article supplement (PMC4649636)
Supplement: supp_115.181214_FigureS1.pdf [file supp_115.181214_FigureS1.pdf]

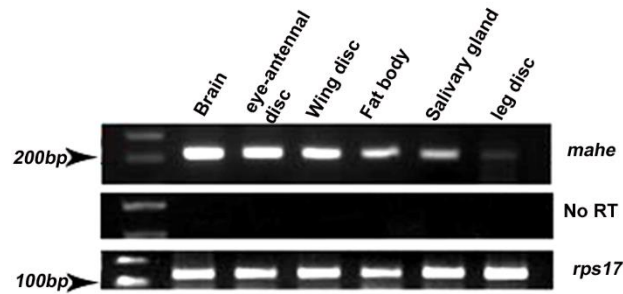

**Figure S1** *mahe* mRNA expresses in larval imaginal discs. Semi-quantitative RT PCR using *mahe* specific primer was performed to examine the expression of *mahe* in various larval tissues. *mahe* transcripts were present in RNA extracted from larval brain, eye-antennal disc, wing disc, fat body, salivary gland and leg discs. *rps17* was used as internal control and No RT (in the absence of reverse transcriptase) was done for each sample to rule out genomic DNA contamination.
