# Supplementary material
Source: PubMed Central journal article supplement (PMC4649636)
Supplement: supp_115.181214_FigureS2.pdf [file supp_115.181214_FigureS2.pdf]

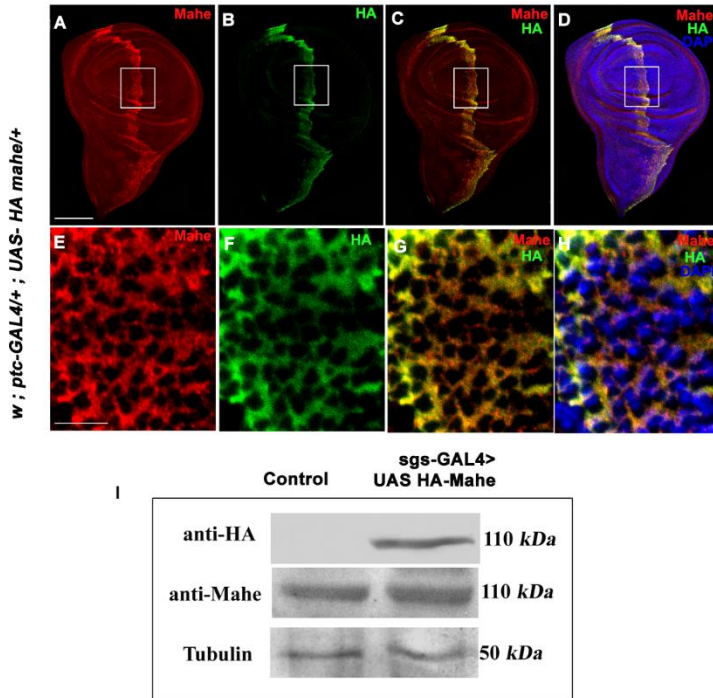

**Figure S2** Detection of ectopic HA-Mahe in the wing imaginal disc. Immunostaining and western blotting was carried out with anti-Mahe and anti-HA antibody. (A-H) Over expressed HA-Mahe protein was localized throughout the cytoplasm and excluded from the nucleus as detected with anti-Mahe (Red, A and E) as well as anti-HA (Green, B and F) in wing imaginal discs. Lower panel is magnified view of boxed area from the upper panel. Western blot with both anti-Mahe and anti-HA detected a 110 kDa band from protein extract of *sgs-GAL4* salivary gland and *sgs-GAL4* driven UAS-HA Mahe salivary gland. Tubulin was used as loading control. Scale bar A-D is 100  $\mu$ m each and E-H is 10  $\mu$ m each.
