# Supplementary material
Source: PubMed Central journal article supplement (PMC4649636)
Supplement: supp_115.181214_FigureS3.pdf [file supp_115.181214_FigureS3.pdf]

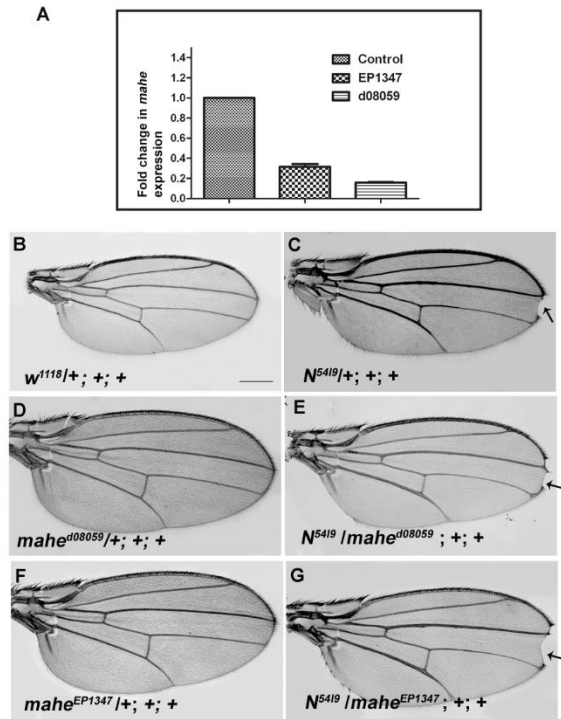

**Figure S3.** Genetic interaction of *mahe*<sup>d08059</sup> and *mahe*<sup>EP1347</sup> hypomorphic alleles of *mahe* with *N*<sup>5419</sup> (Notch loss-of-function) allele. (A) RNA was extracted from five days old adult flies and real time PCR was performed with *mahe* specific primers to monitor *mahe* transcript level in P element insertion (P{XP} d08059 (*mahe*<sup>d08059</sup>) and EP1347 (*mahe*<sup>EP1347</sup>) lines, *mahe* transcripts were significantly lowered in these two P element insertion lines when compared to that of control. (B) Wing with normal morphology. (C) Heterozygous Notch allele *N*<sup>5419</sup>/+ shows mild notching at the wing margin. (D) Heterozygous *mahe* allele (*mahe*<sup>d08059</sup>) shows normal wing morphology. (E) Trans-heterozygous combination of *N*<sup>5419</sup> and *mahe*<sup>d08059</sup> results in enhancement in wing notching phenotype. (F) Heterozygous *mahe* allele (*mahe*<sup>EP1347</sup>) shows normal wing morphology. (G) Trans-heterozygous combination of *N*<sup>5419</sup> and *mahe*<sup>EP1347</sup> also results in enhancement in wing Notching phenotype. Scale bar B-G, 200  $\mu$ m each.
