# Supplementary material
Source: PubMed Central journal article supplement (PMC4649636)
Supplement: supp_115.181214_FigureS4.pdf [file supp_115.181214_FigureS4.pdf]

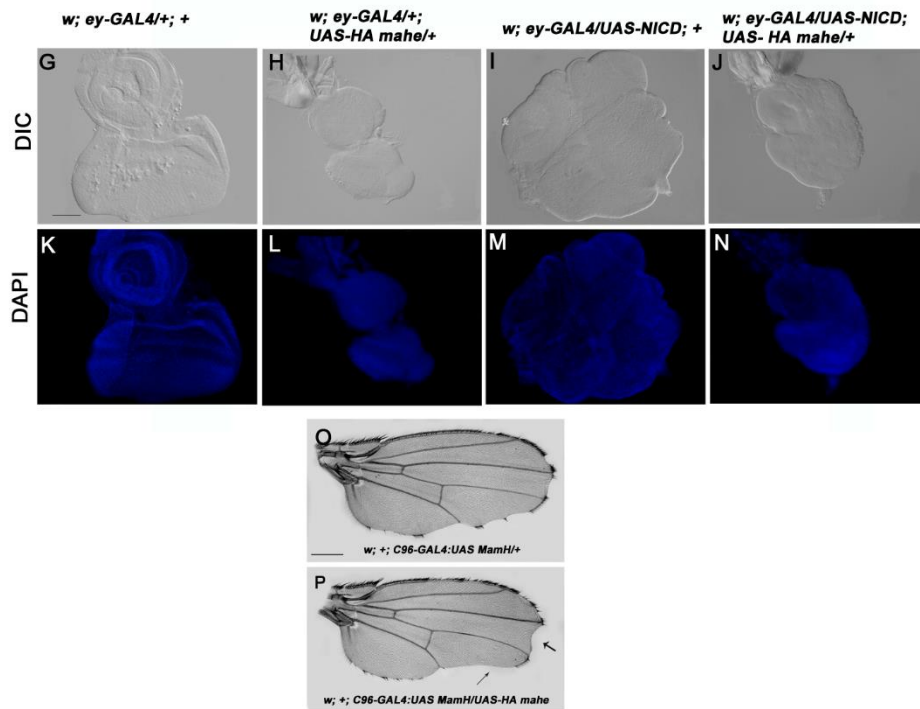

**Figure S4** Genetic interaction of *mahe* with Notch gain-of-function background. (A) Eye-antennal disc with normal morphology. (B) *ey-GAL4* driven expression of *mahe* results in massive reduction in size of eye-antennal disc. (C) *ey-GAL4* driven expression of activated form of Notch (NICD) results in dramatic proliferation of eye tissue. (D) Co-expression of Mahe and NICD with *ey-GAL4* results in significant rescue of Notch mediated proliferation in eye antennal disc. (E) Dominant negative form of *Mam* driven with *C96-GAL4* results in nicked wing margin. (F) In combination with over expressed *mahe*, this phenotype was moderately enhanced (arrow). Scale bar A-H is 50 $\mu$ m each and I, J is 200 $\mu$ m each.
