# Supplementary material
Source: PubMed Central journal article supplement (PMC4649636)
Supplement: supp_115.181214_FigureS5.pdf [file supp_115.181214_FigureS5.pdf]

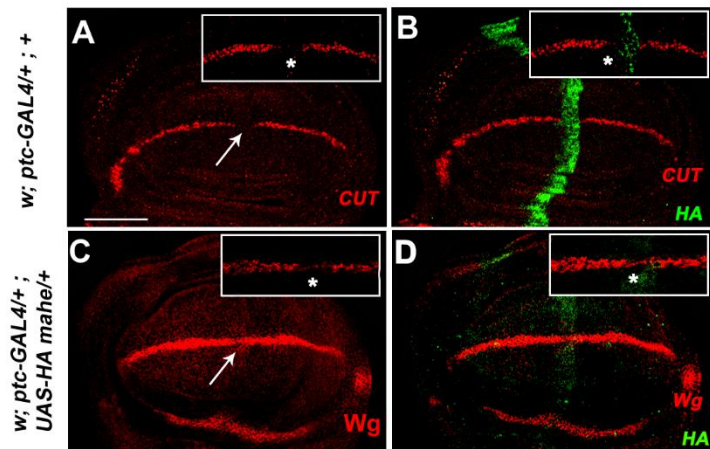

**Figure S5** Ectopic-HA Mahe inhibits Notch signalling. (A-D) Ectopic expression of HA Mahe results in loss of Cut and Wg staining (arrow). (B, D) Double staining of HA, Cut (B) and HA, Wg (D) shows that loss of Cut and Wg expression was specific to *mahe* over expression domain. Scale bar A-D is 50µm each.
